# Supplementary material for: Exploring the Immunomodulatory Potential of Pancreatic Cancer-Derived Extracellular Vesicles through Proteomic and Functional Analyses
Source: MDPI journal article supplement (doi:10.3390/cancers16101795), 2024-05-08
Supplement: s1 [file s1]

EVs

Capan-2 Bxpc-3

**CD63** 35-63 KDa

Precision Plus Protein standard  
#161-0373 BIORAD

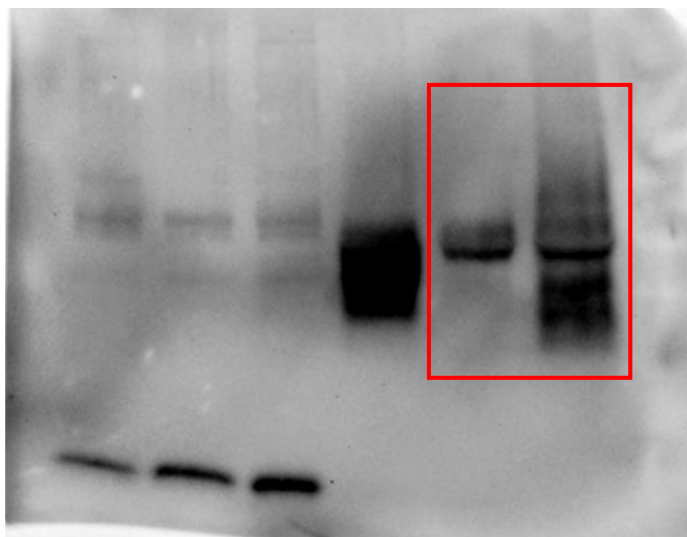

EVs

Capan-2 Bxpc-3

**CD81** 22-26 KDa

Precision Plus Protein standard  
#161-0373 BIORAD

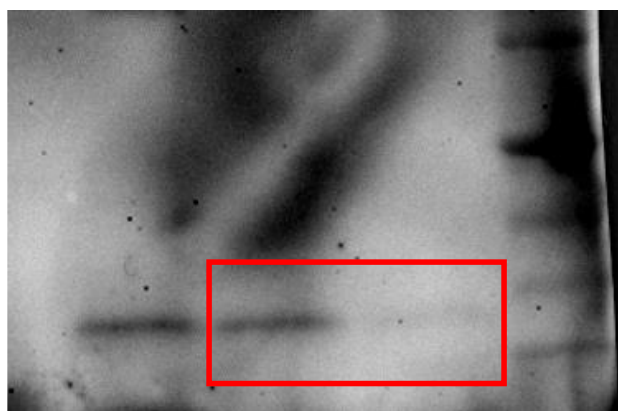

EVs

Capan-2 Bxpc-3

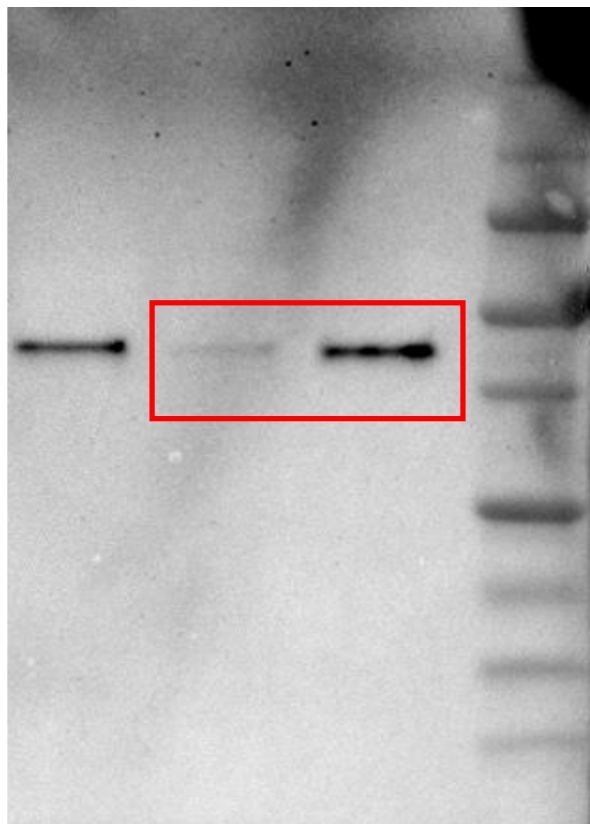

**Flotillin-1** 49 KDa

Precision Plus Protein standard  
#161-0373 BIORAD

PC cells

EVs

Capan-2 Bxpc-3 Capan-2 Bxpc-3

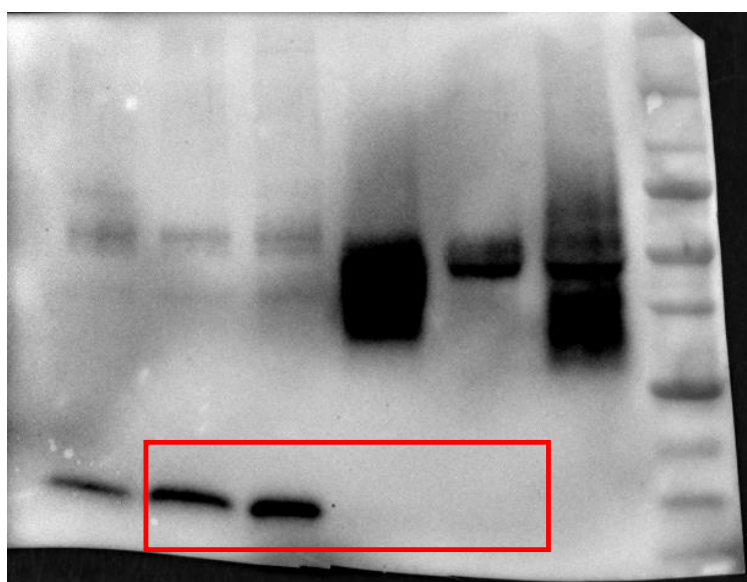

**Cytochrome C** 23 KDa

Precision Plus Protein standard  
#161-0373 BIORAD
